# Supplementary material for: A general self-template-etched solution route for the synthesis of 2D γ-manganese sulfide nanoplates and their enhanced supercapacitive performance
Source: Royal Society of Chemistry journal article supplement (doi:10.1039/c8nj06143b), 2019-01-01
Supplement: c8nj06143b1.pdf [file c8nj06143b1.pdf]

## Supplementary Information

### **A general self-template-etched solution route for synthesis of 2-D $\gamma$ -manganese sulfide nanoplates and its enhanced supercapacitive performance**

Deli Li, Shuang Song, Jiaxue Lu, Jun Liang,\* Yingying Zhang, Li Li\*

State Key Laboratory of High-efficiency Utilization of Coal and Green Chemical Engineering, College of Chemistry and Chemical Engineering, Ningxia University, Yinchuan 750021, China

E-mail: li\_l@nxu.edu.cn; junliang@nxu.edu.cn.

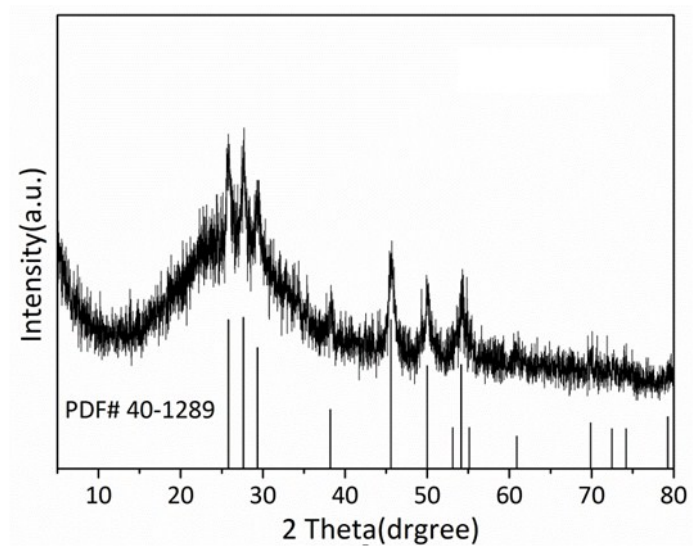

**Fig. S1.** XRD pattern of the as-obtained  $\gamma$ -MnS particles.

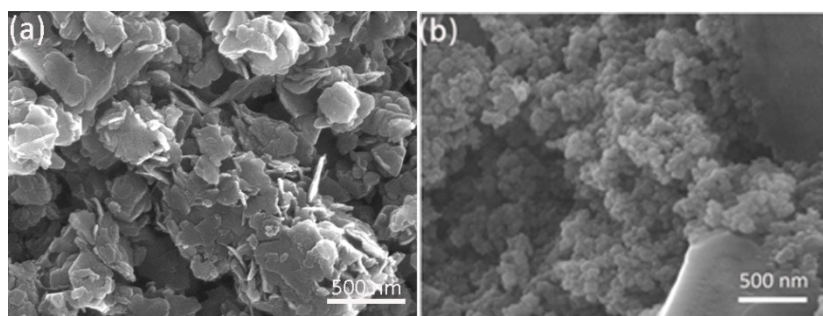

**Fig. S2.** SEM images of  $\gamma$ -MnS products with hydrothermal treatment time of (a) 6 h and (b) 12h.

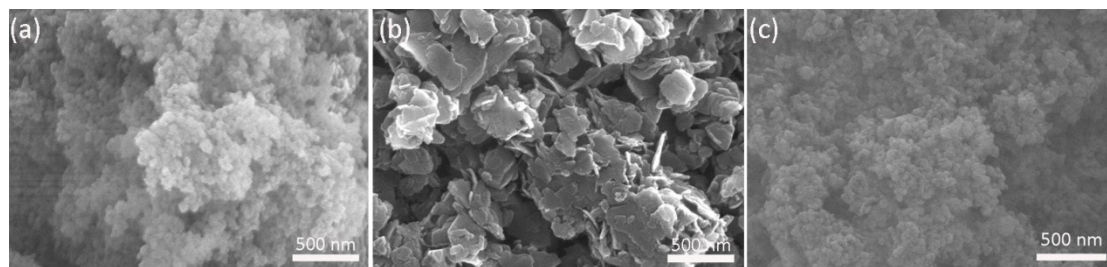

**Fig. S3.** SEM images of the  $\gamma$ -MnS products synthesized with different volume ratio of ethylene glycol and water ratios: (a) 3:5, (B) 4:4 and (C) 5:3.

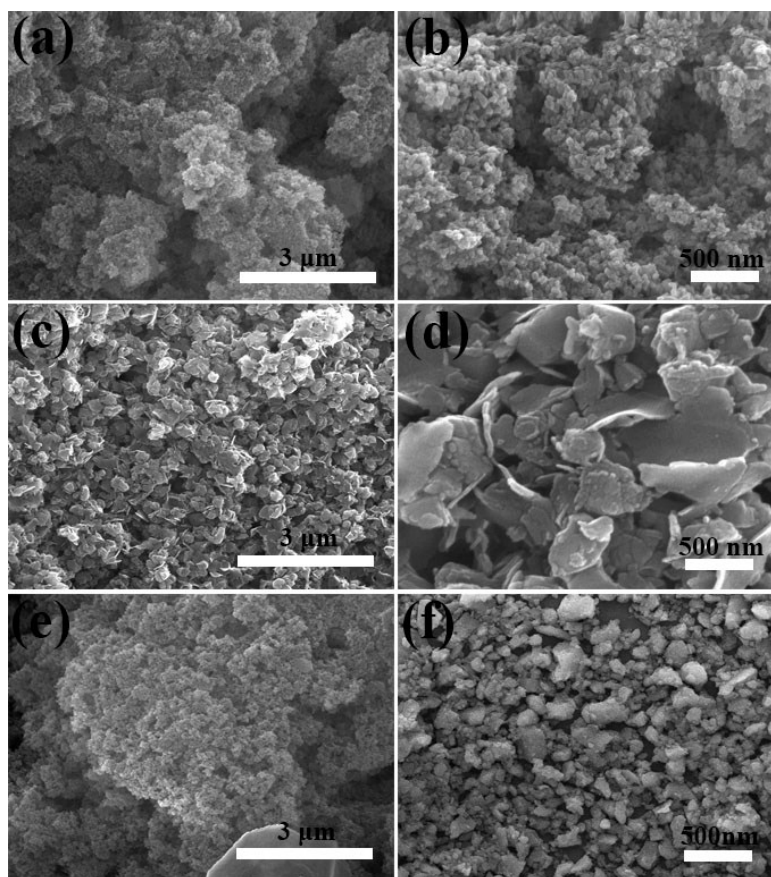

**Fig. S4.** SEM images of the  $\gamma$ -MnS products synthesized with different concentration of Na<sub>2</sub>S solution: (a) 0.01 M, (b) 0.05 M, (c) 0.08 M, (d) 0.1 M, (e) 0.8 M and (f) 1.5 M.

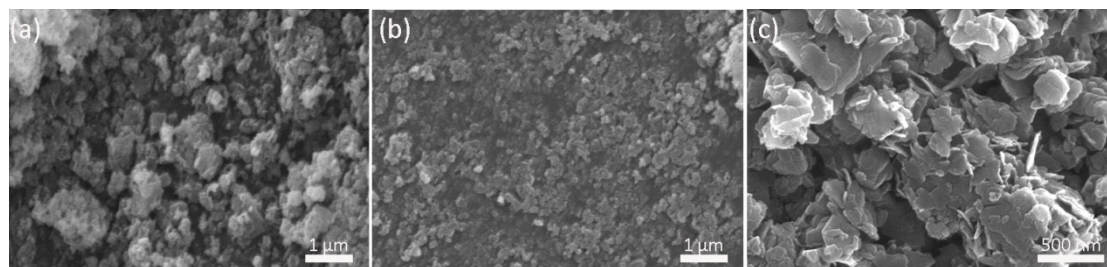

**Fig. S5.** SEM images of the MnS products synthesized with different solvent/H<sub>2</sub>O system: (a) H<sub>2</sub>O, (b) ethanol/H<sub>2</sub>O, and (c) ethylene glycol/H<sub>2</sub>O.

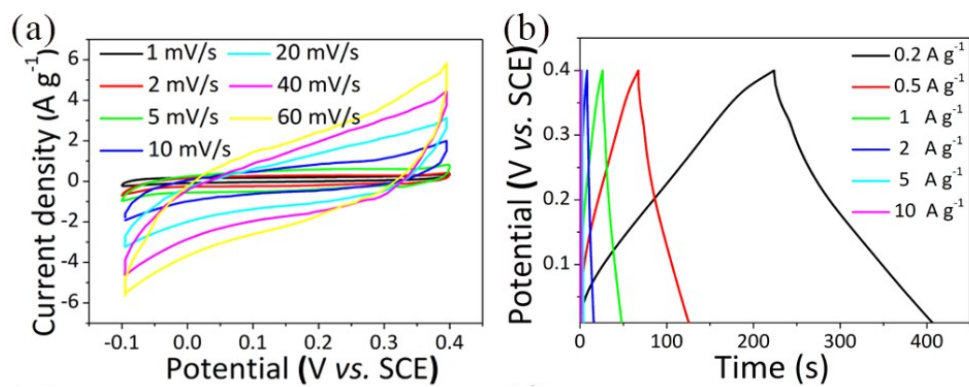

**Fig. S6.** Electrochemical characterizations of the  $\gamma$ -MnS nanoparticle electrode obtained: (a) Cyclic voltammetry curves. (b) Galvanostatic charging-discharging curves

**Table S1** Comparison data of this work with literature of MnS in concern supercapacitive properties.

|                                                         | Current density        | Specific capacity (F g <sup>-1</sup> ) | Electrolyte                                                                                   | Ref.      |
|---------------------------------------------------------|------------------------|----------------------------------------|-----------------------------------------------------------------------------------------------|-----------|
| $\gamma$ -MnS nanoplates                                | 0.2 A g <sup>-1</sup>  | 378                                    | 0.5 M Na <sub>2</sub> SO <sub>4</sub>                                                         | This work |
| MnS/GO-NH <sub>3</sub>                                  | 0.25 A g <sup>-1</sup> | 390.8                                  | 2M KOH                                                                                        | 1         |
| $\gamma$ -MnS nanowire                                  | 0.5 A g <sup>-1</sup>  | 573.9                                  | 2M KOH                                                                                        | 2         |
| $\gamma$ -MnS/rGO-60                                    | 1 A g <sup>-1</sup>    | 547.6                                  | 2 M KOH                                                                                       | 3         |
| $\gamma$ -MnS/rGO                                       | 5 A g <sup>-1</sup>    | 802.5                                  | polysulfide electrolyte (1MKOH/0.5MNa <sub>2</sub> S\$9H <sub>2</sub> O/0.5 M Sulfur powders) | 4         |
| $\alpha$ -MnS/N-rGO                                     | 1 A g <sup>-1</sup>    | 933.6                                  | 3 M KOH                                                                                       | 5         |
| Tetrapod nanorod (TP-NR) $\gamma$ -MnS-MnO <sub>x</sub> | 1 mV s <sup>-1</sup>   | 704.5                                  | 2 M KOH                                                                                       | 6         |
| $\alpha$ -MnS/CT                                        | 1 mV s <sup>-1</sup>   | 710.6                                  | 3 M LiCl                                                                                      | 7         |
| $\alpha$ -MnS microfibers                               | 1 mV s <sup>-1</sup>   | 747                                    | 1 M KOH                                                                                       | 8         |

## References

- [1] Y. Tang, T. Chen, Yu, Y. Qiao, S. Mu, J. Hu and F. Gao, Synthesis of graphene oxide anchored porous manganese sulfide nanocrystals via the nanoscale Kirkendall effect for supercapacitors, *J. Mater. Chem. A*, 2015, 3, 12913-12919.
- [2] T. Chen, Y. Tang, Y. Qiao, Z. Liu, W. Guo, J. Song, S. Mu, S. Yu, Y. Zhao and F. Gao, All-solid-state high performance asymmetric supercapacitors based on novel MnS nanocrystal and activated carbon materials, *Sci. Rep.*, 2016, 6, 23289-23298.
- [3] G. Zhang, M. Kong, Y. Yao, L. Long, M. Yan, X. Liao, G. Yin, Z. Huang, A. M. Asiri and X. Sun, One-pot synthesis of  $\gamma$ -MnS/reduced graphene oxide with enhanced performance for aqueous asymmetric supercapacitors, *Nanotechnology*, 2017, 28, 065402.
- [4] X. Li, J. Shen, N. Li, M. Ye, Fabrication of  $\gamma$ -MnS/rGO composite by facile one-pot solvothermal approach for supercapacitor applications, *J. Power Sources*, 2015, 282, 194-201.
- [5] H. Quan, B. Cheng, D. Chen, X. Su, Y. Xiao, S. Lei, One-pot synthesis of  $\alpha$ -



---

MnS/nitrogen-doped reduced graphene oxide hybrid for high-performance asymmetric supercapacitors, *Electro. Acta*, 2016, 210, 557-566.

[6] Y. Tang, T. Chen, S. Yu. Morphology controlled synthesis of monodispersed manganese sulfide nanocrystals and their primary application in supercapacitors with high performances, *Chem. Commun*, 2015, 51, 9018-9021.

[7] M. S. Javed, X. Han, C. Hu, M. Zhou, Z. Huang, X. Tang and X. Gu, Tracking pseudocapacitive contribution to superior energy storage of MnS nanoparticles grown on carbon textile, *ACS Appl. Mater. Interfaces*, 2016, 8, 24621-24628.

[8] R.B. Pujari, A.C. Lokhande, A.A. Yadav, J.H. Kimb, C.D. Lokhande, Synthesis of MnS microfibers for high performance flexible supercapacitors, *Mater. Design*, 2016, 108, 510-51.
